# Supplementary material
Source: publisher site journal article supplement (https://www.dovepress.com/article/257218)
Supplement: Supplementary file 1 [file get_supplementary_file.php]

Supplement Table 1. The performance of the ANN model, Logistic model and these four risk factors individually in diagnosing LC in the training set.

| Risk factors | AUC | SE | 95% CI | **P* value |
| --- | --- | --- | --- | --- |
| Age, years | 0.579 | 0.0194 | 0.545 - 0.612 | < 0.001 |
| PLT count, 109/L | 0.664 | 0.0184 | 0.632 - 0.696 | < 0.001 |
| PT, s | 0.667 | 0.0181 | 0.634 - 0.698 | < 0.001 |
| T-BIL, μmol/L | 0.596 | 0.0192 | 0.562 - 0.629 | < 0.001 |
| Logistic model | 0.721 | 0.0170 | 0.690 - 0.751 | < 0.001 |
| ANN model | 0.757 | 0.0159 | 0.727 - 0.785 |  |

**P* value is the result of comparing with ANN model.

Abbreviations: ANN, artificial neural network; LC, liver cirrhosis; PLT, platelet; PT, prothrombin time; T-Bil, total bilirubin; AUC, area under the receiver operating characteristic curve; SE, standard error; CI, confidence interval.
